# Supplementary material for: Subtle changes in perivascular endometrial mesenchymal stem cells after local endometrial injury in recurrent implantation failure
Source: PubMed Central journal article supplement (PMC9816312; doi:10.1038/s41598-023-27388-8), 2023-01-05
Supplement: 41598_2023_27388_MOESM1_ESM.pdf [file 41598_2023_27388_MOESM1_ESM.pdf]

**Supplementary Table 1. Detailed Embryo Transfer Cycle Data of the Patients**

| Patient | Embryos before LEI  | Number of ET for LEI | Grade of embryos for LEI | Outcome       | Experiments Involved |
|---------|---------------------|----------------------|--------------------------|---------------|----------------------|
| 1       | Cleavage x 3        | D3 x 2               | G4 and G4                | Biochemical   | S/C                  |
| 2       | Cleavage x 2 BL x 1 | BL x 2               | FE and FE (collapsed)    | Nil           | S                    |
| 3       | BL x 4              | D3 x 2               | G4 and G4                | Biochemical   | C                    |
| 4       | BL x 2              | D5 x 2               | Morula and EC            | LB            | S/C                  |
| 5       | BL x 2              | D3 x 1               | G3                       | Nil           | S                    |
| 6       | Cleavage x 2 BL x 2 | BL x 2               | VEC and VEE              | LB DCDA Twins | S/C                  |
| 7       | Cleavage x 4        | D2 x 2               | G2 and G3                | Nil           | C                    |
| 8       | Cleavage x 4        | D4 x 2               | G2 and Morula            | LB            | S                    |
| 9       | BL x 4              | D3 x 1               | G3                       | Nil           | S                    |
| 10      | Cleavage x 4        | BL x 1               | FE (Expanding)           | Nil           | S                    |
| 11      | BL x 2              | Drop Out             | Drop Out                 |               | S                    |
| 12      | Cleavage x 4        | BL x 1               | FEC                      | Biochemical   | S/C/De               |
| 13      | BL x 2              | BL x 1               | FEB                      | LB            | S/C/De               |
| 14      | Cleavage x 4        | BL x 1               | FE (Expanding)           | LB            | S                    |
| 15      | Cleavage x 4        | ET x 2               | G4 and Morula            | Nil           | S/C                  |
| 16      | Cleavage x 4        | D2 x 2               | G2 and G3                | Biochemical   | S/C                  |
| 17      | Cleavage x 4 BL x 1 | D3 x 2               | Morula x 2               | Nil           | S/C                  |
| 18      | Cleavage x 3 BL x 1 | Drop Out             | Drop Out                 |               | C                    |
| 19      | BL x 2              | BL x 1               | FEC                      | Nil           | S/C                  |
| 20      | Cleavage x 2 BL x 1 | BL x 2               | FEC and FE (Expanding)   | Nil           | S/C                  |
| 21      | BL x 2              | BL x 2               | PEC and PEC              | Biochemical   | S                    |
| 22      | Cleavage x 1 BL x 2 | D3 x 2               | G4 and G4                | Nil           | S/De                 |
| 23      | BL x 2              | BL x 2               | PFEC and FE (Expanding)  | LB            | S/De                 |
| 24      | BL x 3              | BL x 2               | FEB and FEB              | LB Twins      | S                    |
| 25      | Cleavage x 2 BL x 3 | D2 x 2               | G3 and G4                | LB            | S                    |
| 26      | BL x 3              | BL x 2 (Hatched)     | Hatched x 2              | LB            | S/De                 |

Legends: For Grade of Embryos and Blastocysts: Blastocyst (BL), Embryo Day (D), Grade (G), Fully Expanded Grade B (FEB), Fully Expanded Grade C (FEC), Very Early Expanding (VEE), Very Early Cavitation (VEC), Early Cavitation (EC), Fully Expanded (FE), Pseudo Expanded Grade C (PEC), Pseudo Fully Expanded Grade C (PFEC), For others: Embryo Transfer (ET), Local Endometrial Injury (LEI), Dichorionic Diamniotic (DCDA), live birth (LB), Proportion of SUSD2 (S), Clonogenicity Assay (C), Decidualisation Assay (De).
